# Supplementary material for: Cultivable Fungi from Amazon River Dolphins Engaged in Wildlife Ecotourism in the Anavilhanas National Park, Brazil
Source: Vet Med Int. 2024 Apr 23;2024:1267770. doi: 10.1155/2024/1267770 (PMC11074823; doi:10.1155/2024/1267770)
Supplement: Supplementary Materials — Table S1: “Fungal strains from Skin and Oral Cavity of Amazon River dolphins (Inia geoffrensis) and water samples in the Anavilhanas region, Amazonas: NCBI isolate accession numbers, % identity/similarity, and reference accession numbers.” [file 1267770.f1.docx]

Cultivable fungi from Amazon River dolphins engaged in wildlife ecotourism in the Anavilhanas National Park, Brazil

Marla J. Alves1, Fernanda Rodrigues Fonseca2, Layssa do Carmo Barroso3, Érica Simplício de Souza4, Marcelo Derzi Vidal5, Ani Beatriz Jackisch-Matsuura1, João Vicente Braga de Souza6*, Salvatore Siciliano7

Table S1 - "Isolated Fungal Strains from Bottlenose Dolphins and Water Samples in the Anavilhanas Region, Amazonas: NCBI Isolate Accession Numbers, % Identity/Similarity, and Reference Accession Numbers"

| Isolate | NCBI Isolate acession number | % Identity / similarity | References acession number |
| --- | --- | --- | --- |
| *Penicillium citrinum* A1-SAB_01 | [OQ918996](https://www.ncbi.nlm.nih.gov/nuccore/OQ918996) | NCBI (99,25%) / CBS-KNAW (99,32%) | KU897000.1 / CNRMA14.364 |
| *Fomitopsis meliae* A1-SAB_02 | [OQ919046](https://www.ncbi.nlm.nih.gov/nuccore/OQ919046) | NCBI (99,17%) / CBS-KNAW (98,78%) | KC585351.1 / SH1519482FU KR05775 |
| *Rhodotorula mucilaginosa* A1-SAB_03 | [OQ919155](https://www.ncbi.nlm.nih.gov/nuccore/OQ919155) | NCBI (99,63%) / CBS-KNAW (98,58%) | KP658860.1 / CBS 1382 |
| *Exophiala dermatitidis* A1-SAB_05 | [OQ919028](https://www.ncbi.nlm.nih.gov/nuccore/OQ919028) | NCBI (100%) / CBS-KNAW (99,21%) | MF320224.1 / SH1529581.08FU KX964623 |
| *Candida* *spencermartinsiae* A6-SAB_01 | [OQ919167](https://www.ncbi.nlm.nih.gov/nuccore/OQ919167) | NCBI (100%) / CBS-KNAW (99,14%) | OVV985326.1 / CBS10893 |
| *Penicillium* *chermesinum* A6-CHRO_01 | [OQ919247](https://www.ncbi.nlm.nih.gov/nuccore/OQ919247) | NCBI (100%) / CBS-KNAW (100%) | MN220649.1 / SH11605228FU KM278060 |
| *Trichosporon montevideense* A2-CHRO_01 | [OQ919245](https://www.ncbi.nlm.nih.gov/nuccore/OQ919245) | NCBI (95,12%) / CBS-KNAW (95,92%) | KP132872.2 / CNRMA8.1332 |
| *Diaporthe lithocarpus* A3-NSA_01 | [OQ923788](https://www.ncbi.nlm.nih.gov/nuccore/OQ923788) | NCBI (100%) / CBS-KNAW (96,02%) | KR703276.1 / SH1540604.08FU KU375690 |
| *Toxicocladosporium irritans* A7-SAB_01 | [OQ921702](https://www.ncbi.nlm.nih.gov/nuccore/OQ921702) | NCBI (99,26%) / CBS-KNAW (99,3%) | LN834443.1 / MH857249.1 / SH1572793.08FU JN974765 |
